# Supplementary material for: Cesium lead bromide perovskite nanocrystals synthesized via supersaturated recrystallization at room temperature: comparison of one-step and two-step processes
Source: Royal Society of Chemistry journal article supplement (doi:10.1039/d4na00423j), 2024-01-01
Supplement: d4na00423j1.pdf [file d4na00423j1.pdf]

## Supplementary Information

### Cesium Lead Bromide Perovskite Nanocrystals Synthesized by Supersaturated Recrystallization at Room Temperature: Comparison of One-Step and Two-Step Processes

Dula Adugna Idosa,<sup>a,b</sup> Muluaem Abebe,<sup>a</sup> Dhakshnamoorthy Mani,<sup>a</sup> Jibin Keloth Paduvilan,<sup>c</sup> Lishin Thottathi,<sup>d</sup> Aparna Thankappan,<sup>e</sup> Sabu Thomas<sup>f</sup> and Jung Yong Kim<sup>\*..g,h</sup>

<sup>a</sup> Faculty of Materials Science and Engineering, Jimma Institute of Technology, Jimma University, Jimma P.O. Box 378, Ethiopia

<sup>b</sup> Department of Physics, College of Natural and Computational Science, Mizan-Tepi University, Mizan P.O. Box 260, Ethiopia

<sup>c</sup> School of Chemical Sciences, Mahatma Gandhi University, Kottayam 686560, India

<sup>d</sup> Department of Physics and Mathematics, Università Cattolica del Sacro Cuore, Via della Garzetta, 48, 25133 Brescia, BS, Italy

<sup>e</sup> Department of Physics, Baselius College, Kottayam 686001, India

<sup>f</sup> School of Energy Materials, Mahatma Gandhi University, Kottayam 686560, India

<sup>g</sup> Department of Materials Science and Engineering, Adama Science and Technology University, Adama P.O. Box 1888, Ethiopia

<sup>h</sup> Center of Advanced Materials Science and Engineering, Adama Science and Technology University, Adama P.O. Box 1888, Ethiopia

\* Correspondence: [jungyong.kim@astu.edu.et](mailto:jungyong.kim@astu.edu.et)

ORCID ID: <https://orcid.org/0000-0002-7736-6858>

## Electronic Structures of CsPbBr<sub>3</sub> Perovskite:

Density functional theory (DFT)-based first-principle calculations were carried out to determine electronic structures of CsPbBr<sub>3</sub> perovskites. The cubic phase of CsPbBr<sub>3</sub> belonging to the space group Pm3m with (No.221) was taken into account. Figure S1a shows the band structure of CsPbBr<sub>3</sub>'s unit cell with cubic structure. Here, both the valence band maximum (VBM) and conduction band minimum (CBM) were located at the k-point **R**, signifying a direct bandgap semiconductor. The bandgap ( $E_g$ ) was estimated to be 1.44 eV, which is smaller than  $\sim 2.3$  eV of the experimental result. However, it is consistent with the literature reports based on the *generalized gradient approximation* (GGA) with *Perdew-Berke-Ernzerhof for solids* (PBEsol), i.e., (PBEsol\_GGA) method (the typical underestimation, i.e., smaller value, of bandgap).<sup>S1,S2</sup> Figure S1b demonstrates the projected density of states (PDOS) in which the VBM is dominated by 4p<sup>5</sup> whereas the CBM by 6p<sup>2</sup> orbitals.

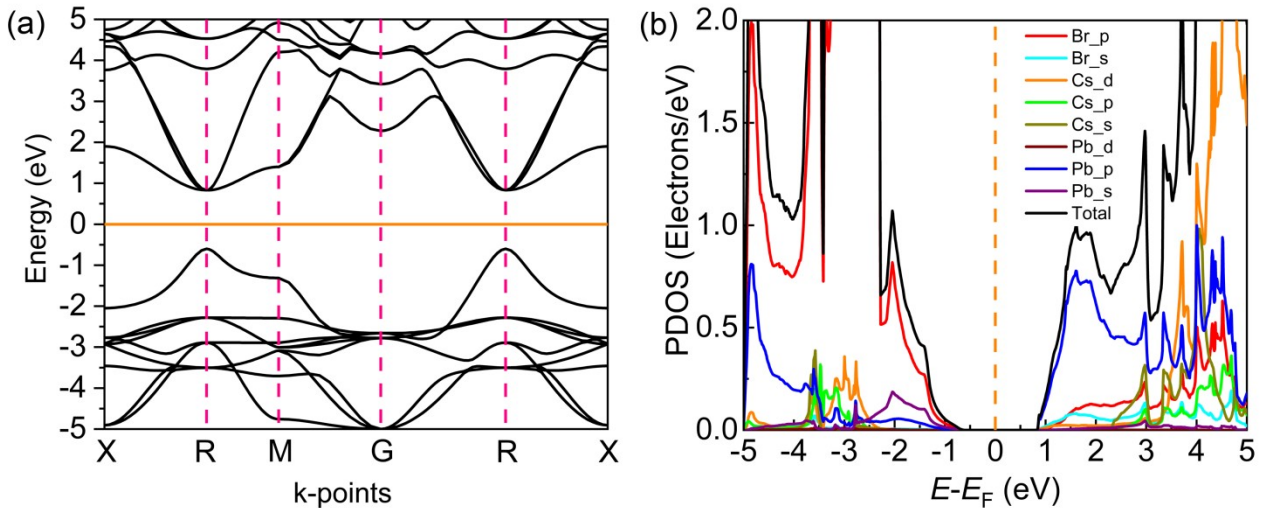

**Figure S1.** (a) Electronic band structure of CsPbBr<sub>3</sub>. (d) Projected density of states (PDOS) of CsPbBr<sub>3</sub>.

### Conversion of Water Contact Angle to Surface Energy to Solubility Parameter:

According to Li and Neumann, the water contact angle ( $\theta_c$ ) has a following relationship,

$$\cos \theta_c = -1 + 2\sqrt{\gamma_{sv}/\gamma_{lv}} \cdot \exp\left[-\bar{\beta}(\gamma_{lv} - \gamma_{sv})^2\right] \quad (S1)$$

where,  $\gamma_{lv}$ ,  $\gamma_{sv}$  and  $\gamma_{sl}$  are surface energies for liquid-vapor, solid-vapor, and solid-liquid, respectively, whereas the constant  $\bar{\beta}$  is  $0.000115 \text{ m}^4 \text{ mJ}^{-2}$ , and  $\gamma_{lv} = 72.8 \text{ mJ m}^{-2}$  for water.<sup>S3</sup> Hence, when  $\theta_c = 10.57^\circ$  for CsPbBr<sub>3</sub>,<sup>S4</sup>  $\gamma_{sv} = 71.59391 \text{ mJ m}^{-2}$  is calculated by solving Equation (S1) via the Newton-Raphson method. Then, through the relationship  $\delta_2 \left[ \text{cal}^{1/2} \text{cm}^{-3/2} \right] = 1.829058 \sqrt{\gamma_{sv}}$ ,<sup>S5</sup>  $\delta_{CsPbBr_3}$  is estimated to be  $15.5 \text{ cal}^{1/2} \text{cm}^{-3/2}$ . In the same vein, when  $\theta_c = 37.57^\circ$  (processed via toluene) and  $23.69^\circ$  (processed via dodecane) for CsPbBr<sub>3</sub> NCs,<sup>S6</sup>  $\gamma_{sv} = 61.60304 \text{ mJ m}^{-2}$  and  $\gamma_{sv} = 61.59607 \text{ mJ m}^{-2}$ , resulting in  $\delta_{CsPbBr_3-NC} = 14.356 \approx 14.36 \text{ cal}^{1/2} \text{cm}^{-3/2}$  and  $\delta_{CsPbBr_3-NC} = 14.355 \approx 14.36 \text{ cal}^{1/2} \text{cm}^{-3/2}$ , respectively. Interestingly, the quasi 2D hybrid lead bromide perovskite ( $\text{BA}_2\text{FA}_{n-1}\text{Pb}_n \text{Br}_{3n+1}$ ,  $n \rightarrow 1$ ; BA and FA stand for n-butyl ammonium and formamidinium, respectively) was reported to have the solubility parameters of from  $15.38 \text{ cal}^{1/2} \text{cm}^{-3/2}$  to  $15.60 \text{ cal}^{1/2} \text{cm}^{-3/2}$  depending on the processing conditions, verifying the aforementioned data<sup>S4,S6</sup> are reasonable values.<sup>S7</sup>

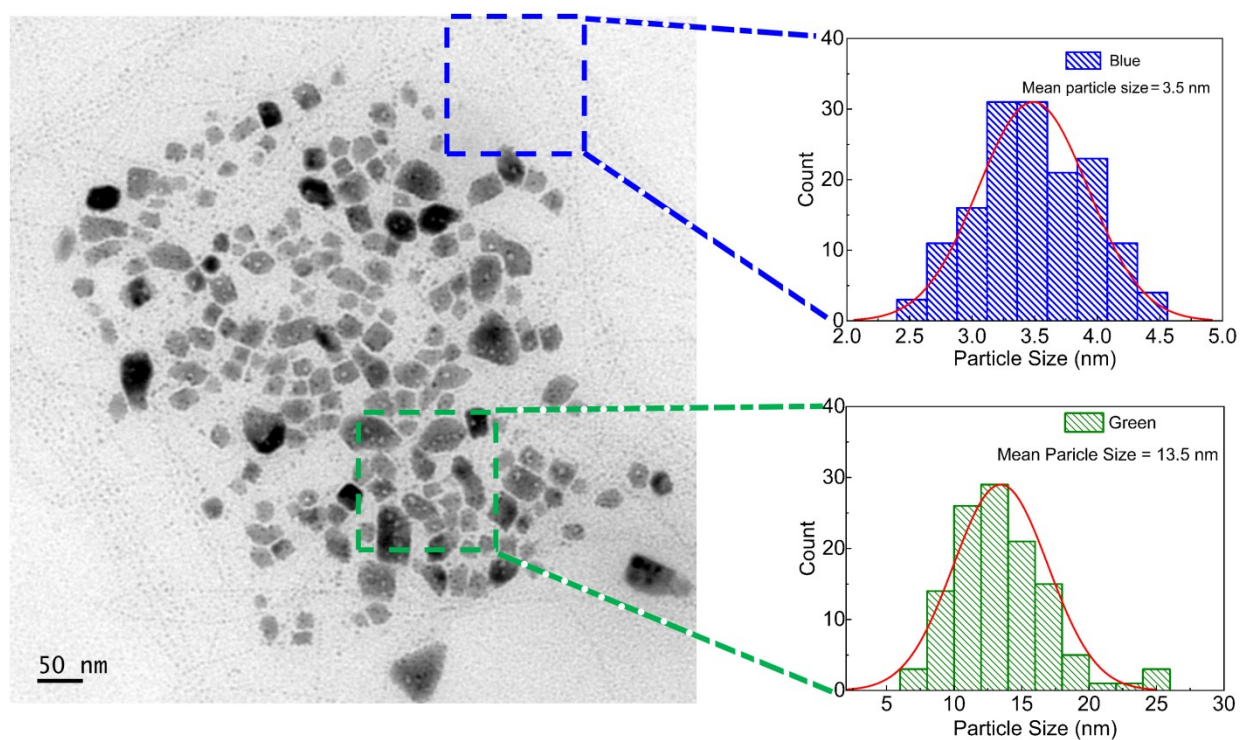

**Figure S2.** TEM image of unpurified two-step synthesized CsPbBr<sub>3</sub> NCs showing particles distribution. Blue-emitting NC size:  $\sim 3.5 \pm 0.4$  nm; Green-emitting NC size:  $\sim 13.5 \pm 3.5$  nm.

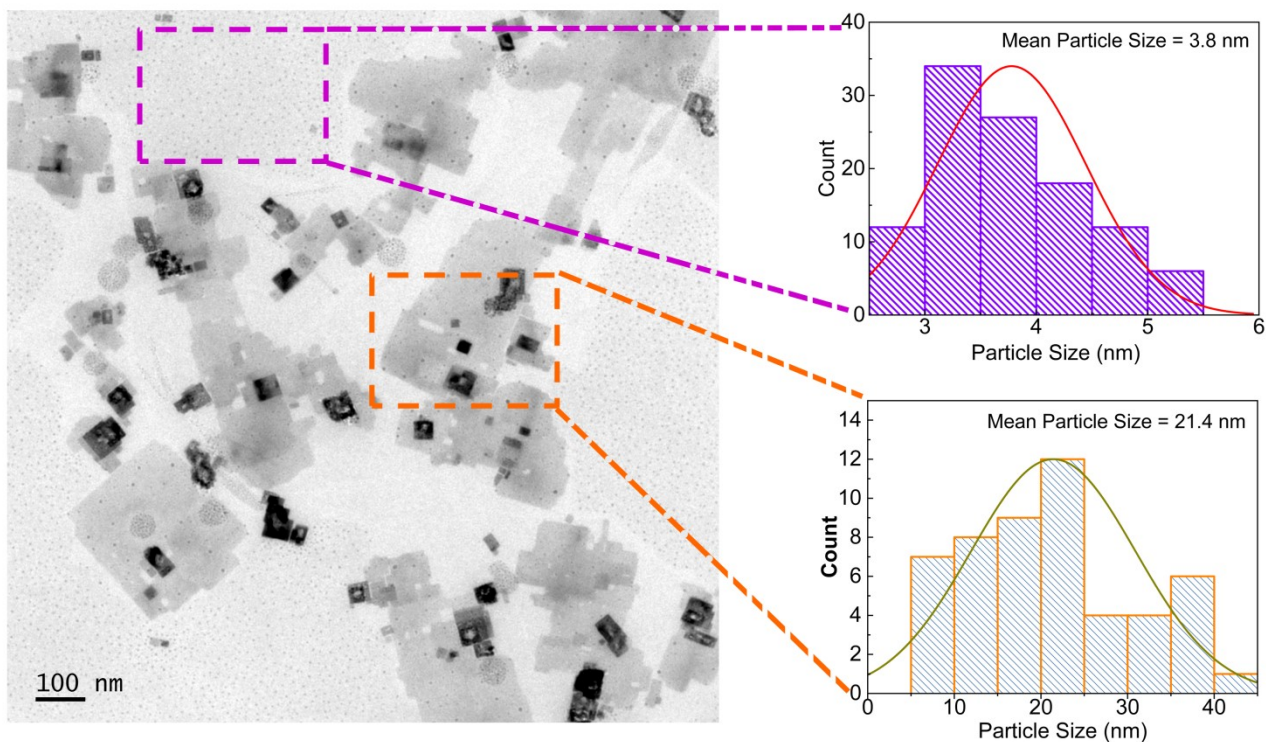

**Figure S3.** TEM images of CsPbBr<sub>3</sub> NCs with CuBr<sub>2</sub> (unpurified) synthesized by two-step process with CuBr<sub>2</sub>:PbBr<sub>2</sub> (= 1:4 molar ratio) displaying a bimodal distribution of NCs. Blue-emitting NC size:  $\sim 3.8 \pm 0.7$  nm; Green-emitting NC size:  $\sim 21.4 \pm 9.5$  nm.

## References

- S1. D. Yan, T. Shi, Z. Zang, T. Zhou, Z. Liu, Z. Zhang, J. Du, Y. Leng and X. Tang, *Small*, 2019, **15**, 1901173.
- S2. Y. Zhang, G. Li, C. She, S. Liu, F. Yue, C. Jing, Y. Cheng and J. Chu, *Nano Res.*, 2021, **14**, 2770–2775.
- S3. D. Li, A.W. Neumann, *J. Colloid Interface Sci.*, 1990, **137**, 304-307.
- S4. X. Zeng, W. Li, C. Yan, J. Cao, X. Fu and W. Yang, *J. Mater. Chem. C*, 2021, **9**, 15967-15976.
- S5. S. Nilsson, A. Bernasik, A. Budkowski, E. Moons, *Macromolecules*, 2007, **40**, 8291–8301.
- S6. A. Gao, J. Yan, Z. Wang, P. Liu, D. Wu, X. Tang, F. Fang, S. Ding, X. Li, J. Sun, M. Cao, L. Wang, L. Li, K. Wang and X. W. Sun, *Nanoscale*, 2020, **12**, 2569-2577.
- S7. J.Y. Kim, Y. Yoo, J. Kim, H. J. Park, W. Cho, S. Lee, Y.-E. Sung and S. Bae, *ACS Appl. Opt. Mater.*, 2024, **2**, 108-117.
